# Supplementary material for: IL-33 Enhances IFNγ and TNFα Production by Human MAIT Cells: A New Pro-Th1 Effect of IL-33
Source: MDPI journal article supplement (doi:10.3390/ijms221910602), 2021-09-30
Supplement: s1 [file s1]

**Table S1.** Medians, quartiles (upper and lower limit) and p values (Mann Whitney) for all measured cytokines and chemokines produced by sorted MAIT cells in response to IL-33 or IL-12 or IL-33 + IL-12 stimulations.

| <i>Gene</i>                        | IL-33 or IL-12 |             |             | IL-33 + IL-12 |             |             | <i>p</i> value |
|------------------------------------|----------------|-------------|-------------|---------------|-------------|-------------|----------------|
|                                    | Median         | Upper Limit | Lower Limit | Median        | Upper Limit | Lower Limit |                |
| <i>ACE-Hs00174179_m1</i>           | 0.07           | 0.07        | 0.07        | 1000.00       | 1000.00     | 250.07      | 0.067          |
| <i>BAX-Hs00180269_m1</i>           | 14.81          | 18.31       | 12.76       | 13.93         | 14.16       | 11.13       | 0.610          |
| <i>BCL2-Hs00153350_m1</i>          | 1.54           | 2.81        | 1.29        | 1.19          | 1.31        | 1.02        | 0.095          |
| <i>BCL2L1-Hs00169141_m1</i>        | 1.13           | 1.52        | 0.55        | 1.44          | 2.87        | 0.75        | 0.352          |
| <i>CCL3-Hs00234142_m1</i>          | 0.94           | 2.22        | 0.38        | 7.81          | 11.05       | 5.56        | <b>0.010</b>   |
| <i>CCL5-Hs00174575_m1</i>          | 75.55          | 92.41       | 32.12       | 44.86         | 63.57       | 40.13       | 0.476          |
| <i>CCR4-Hs99999919_m1</i>          | 0.79           | 2.58        | 0.62        | 0.97          | 1.94        | 0.64        | 0.696          |
| <i>CCR5-Hs00152917_m1</i>          | 6.46           | 14.68       | 4.46        | 4.29          | 9.45        | 2.98        | 0.257          |
| <i>CCR7-Hs00171054_m1</i>          | 0.72           | 1.10        | 0.11        | 0.39          | 0.85        | 0.12        | 0.905          |
| <i>CD28-Hs00174796_m1</i>          | 2.07           | 3.29        | 1.67        | 2.44          | 3.04        | 1.76        | 0.914          |
| <i>CD3E-Hs00167894_m1</i>          | 11.97          | 16.02       | 5.65        | 6.78          | 8.42        | 3.56        | 0.257          |
| <i>CD40-Hs00374176_m1</i>          | 0.30           | 3.88        | 0.25        | 0.29          | 0.51        | 0.06        | 0.800          |
| <b><i>CD40LG-Hs00163934_m1</i></b> | 0.60           | 1.02        | 0.35        | 2.29          | 3.02        | 1.98        | <b>0.010</b>   |
| <i>CD68-Hs00154355_m1</i>          | 0.30           | 1.17        | 0.20        | 0.21          | 0.41        | 0.09        | 0.393          |
| <b><i>CSF1-Hs00174164_m1</i></b>   | 0.67           | 0.96        | 0.55        | 1.99          | 2.53        | 1.33        | <b>0.032</b>   |
| <i>CXCR3-Hs00171041_m1</i>         | 0.17           | 0.40        | 0.13        | 0.08          | 0.84        | 0.04        | 0.357          |
| <i>ECE1-Hs00154837_m1</i>          | 0.18           | 0.38        | 0.08        | 0.24          | 0.28        | 0.12        | 0.967          |
| <i>FAS-Hs00163653_m1</i>           | 1.12           | 1.73        | 0.69        | 1.45          | 2.01        | 1.09        | 0.448          |
| <i>FASLG-Hs00181225_m1</i>         | 1.89           | 2.72        | 1.27        | 3.11          | 3.37        | 0.62        | 0.714          |
| <i>GNLY-Hs00246266_m1</i>          | 1.96           | 3.93        | 1.21        | 3.60          | 4.66        | 1.48        | 0.610          |
| <b><i>GZMB-Hs00188051_m1</i></b>   | 0.19           | 0.77        | 0.14        | 26.11         | 51.20       | 8.11        | <b>0.029</b>   |
| <i>HLA-DRA-Hs00219575_m1</i>       | 0.12           | 0.17        | 0.06        | 0.25          | 1.06        | 0.13        | 0.400          |
| <i>HMOX1-Hs00157965_m1</i>         | 0.31           | 0.93        | 0.20        | 1.19          | 1.97        | 0.23        | 0.400          |
| <i>ICAM1-Hs00164932_m1</i>         | 0.77           | 2.31        | 0.34        | 1.96          | 4.04        | 0.74        | 0.343          |
| <i>ICOS-Hs00359999_m1</i>          | 0.24           | 0.41        | 0.12        | 0.37          | 0.39        | 0.05        | >0.999         |
| <b><i>IFNG-Hs00174143_m1</i></b>   | 0.27           | 0.85        | 0.09        | 310.79        | 449.07      | 193.32      | <b>0.029</b>   |
| <i>IKBKB-Hs00395088_m1</i>         | 2.23           | 2.71        | 1.81        | 1.35          | 2.56        | 0.75        | 0.262          |
| <i>IL12A-Hs00168405_m1</i>         | 0.10           | 0.18        | 0.02        | 0.02          | 0.03        | 0.01        | 0.500          |
| <i>IL15-Hs00174106_m1</i>          | 0.05           | 0.16        | 0.03        | 0.09          | 0.11        | 0.02        | 0.875          |
| <b><i>IL2RA-Hs00166229_m1</i></b>  | 0.32           | 1.84        | 0.25        | 6.86          | 12.09       | 5.70        | <b>0.029</b>   |
| <i>IL8-Hs00174103_m1</i>           | 0.40           | 1.57        | 0.18        | 0.72          | 1.09        | 0.01        | >0.999         |
| <b><i>LTA-Hs00236874_m1</i></b>    | 0.48           | 0.69        | 0.21        | 4.34          | 7.46        | 2.73        | <b>0.029</b>   |
| <i>NFKB2-Hs00174517_m1</i>         | 3.06           | 6.85        | 2.56        | 9.26          | 12.26       | 6.07        | 0.067          |
| <i>PRF1-Hs00169473_m1</i>          | 7.67           | 10.10       | 6.61        | 7.06          | 14.57       | 2.54        | 0.914          |
| <i>PTPRC-Hs00365634_g1</i>         | 29.26          | 37.99       | 24.50       | 20.23         | 30.61       | 17.03       | 0.114          |
| <i>SKI-Hs00161707_m1</i>           | 11.41          | 16.62       | 7.09        | 7.16          | 10.69       | 3.54        | 0.171          |
| <i>SMAD3-Hs00232219_m1</i>         | 19.63          | 31.88       | 8.98        | 14.18         | 21.86       | 7.56        | 0.476          |
| <i>SMAD7-Hs00178696_m1</i>         | 6.52           | 8.05        | 5.67        | 4.14          | 4.66        | 1.45        | 0.067          |
| <i>STAT3-Hs00234174_m1</i>         | 10.42          | 13.34       | 7.77        | 6.86          | 11.15       | 4.40        | 0.257          |
| <i>TBX21-Hs00203436_m1</i>         | 5.63           | 7.69        | 4.24        | 8.20          | 9.03        | 3.56        | 0.610          |
| <i>TGFB1-Hs00171257_m1</i>         | 32.03          | 56.83       | 19.82       | 29.59         | 38.14       | 10.54       | 0.610          |
| <b><i>TNF-Hs00174128_m1</i></b>    | 6.59           | 16.87       | 5.37        | 21.64         | 32.95       | 12.68       | <b>0.047</b>   |
| <i>TNFRSF18-Hs00188346_m1</i>      | 0.02           | 0.11        | 0.02        | 0.99          | 1.41        | 0.46        | 0.057          |
| <i>VEGF-Hs00173626_m1</i>          | 0.34           | 2.20        | 0.06        | 1.11          | 2.56        | 0.29        | 0.571          |
